# Supplementary material
Source: publisher site journal article supplement (https://www.dovepress.com/article/563951)
Supplement: Supplementary file 1 [file Revised%20Supplemental%20Figure%20and%20Table.pdf]

# Supplemental Figures & Tables

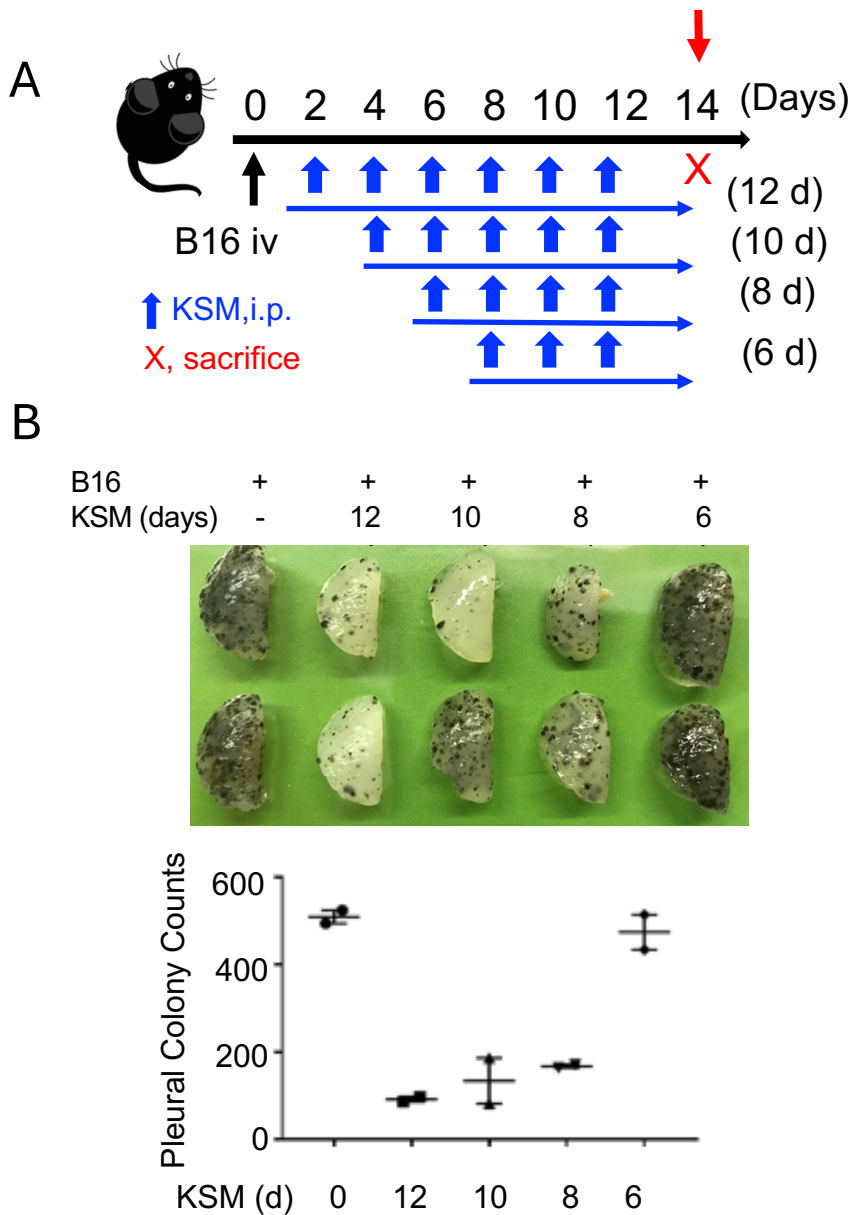

**Figure S1. Kasugamycin (KSM) inhibition of melanoma lung metastasis correlates positively with duration of KSM treatment.** WT mice were challenged with B16-F10 (B16) melanoma cells, then the KSM (100 mg/kg) was delivered to the mice at different time points to see the time-kinetic effect of KSM. (A) KSM treatment protocol (B) Photograph of melanoma lung metastasis with different treatment time points.

A

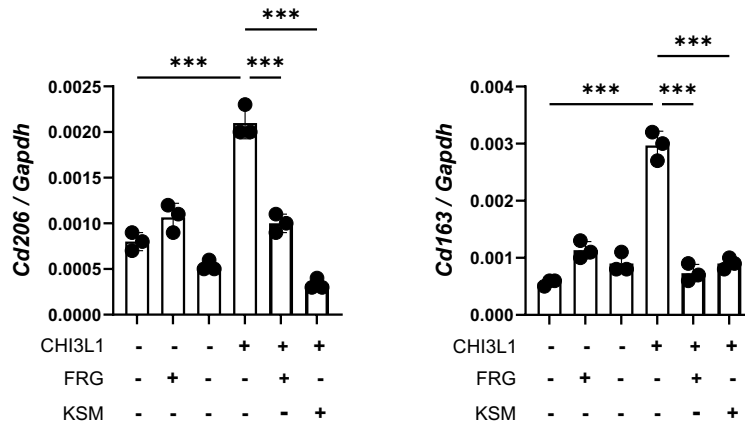

B

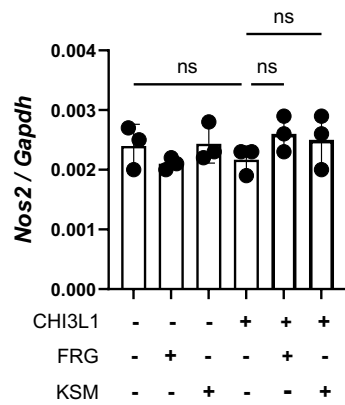

**Figure S2. Kasugamycin (KSM) inhibition of CHI3L1-driven M2 macrophage differentiation in AMJ2-C11 cells.** AMJ2-C11 cells were stimulated with rCHI3L1 with or without FRG/KSM. The mRNA expressions of Cd206 and Cd163 (A) and Nos2 (B) were evaluated by qRT-PCR. The values are the mean  $\pm$  SEM. ns, not significant, \*\*\* $P < 0.001$  (One-Way ANOVA, multiple comparisons).

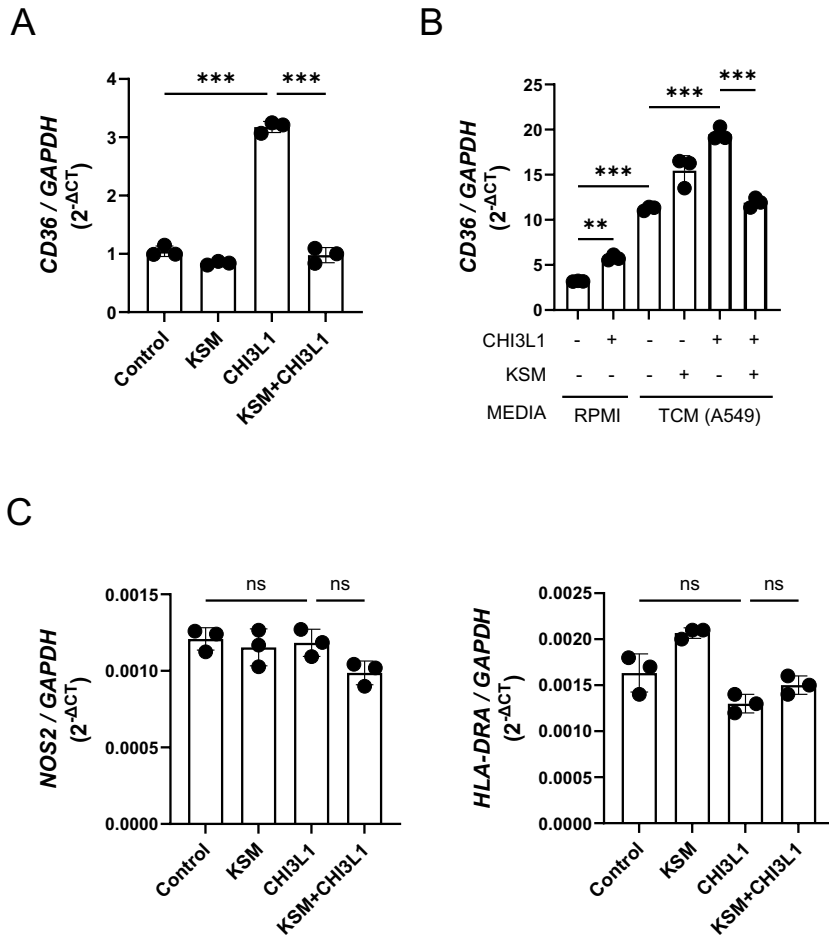

**Figure S3. Kasugamycin (KSM) inhibition of CHI3L1-driven M2 macrophage differentiation in Human monocytic THP-1 cells.** THP-1 cells were stimulated with CHI3L1 in the presence and absence of tumor-conditioned medium (TCM, A549 cell culture supernatant). The mRNA expressions of CD36 (A and B) (typical M2 macrophage differentiation marker, together with other markers such as CD206 and CD163, as described in the main text) and NOS2 and HLA-DRA (C) (typical M1 differentiation marker) were evaluated by qRT-PCR. The values are the mean  $\pm$  SEM. ns, not significant, \*\* $P$ <0.01, \*\*\* $P$ <0.001 (One-Way ANOVA, multiple comparisons).

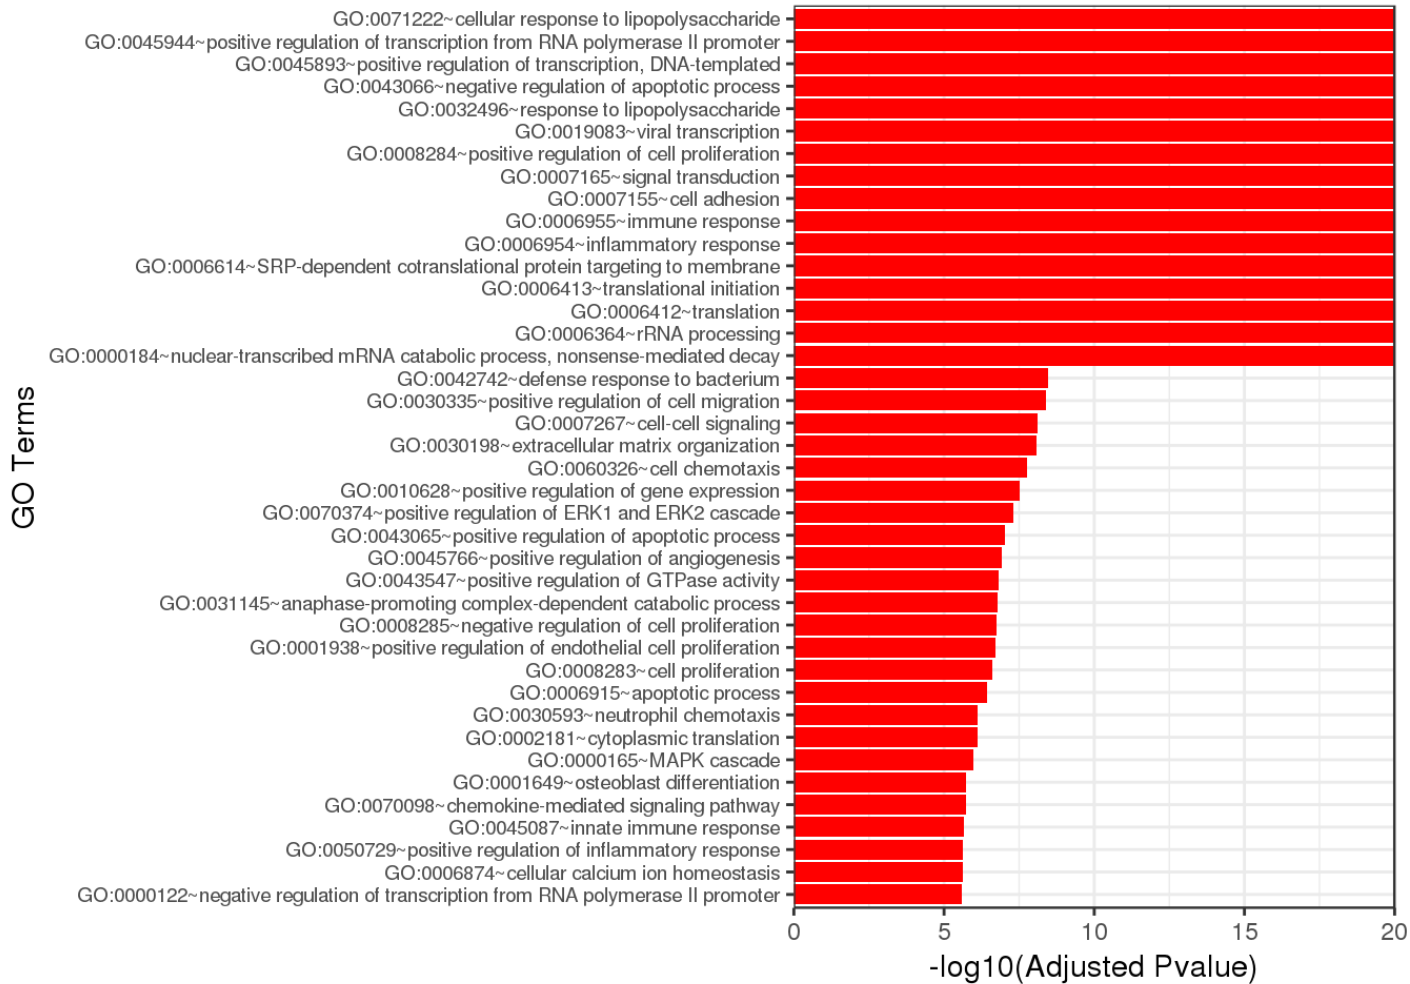

**Figure S4. Gene ontology analysis on the significantly differentially expressed genes stimulated by CHI3L1 vs PBS control in the differentiated macrophages.** The genes were clustered by their gene ontology, and the enrichment of gene ontology terms was tested using Fisher exact test (GeneSCF v1.1-p2). This figure shows gene ontology terms, if any, that are significantly enriched with an adjusted p-value less than 0.05 in the differentially expressed gene sets (up to 40 terms).

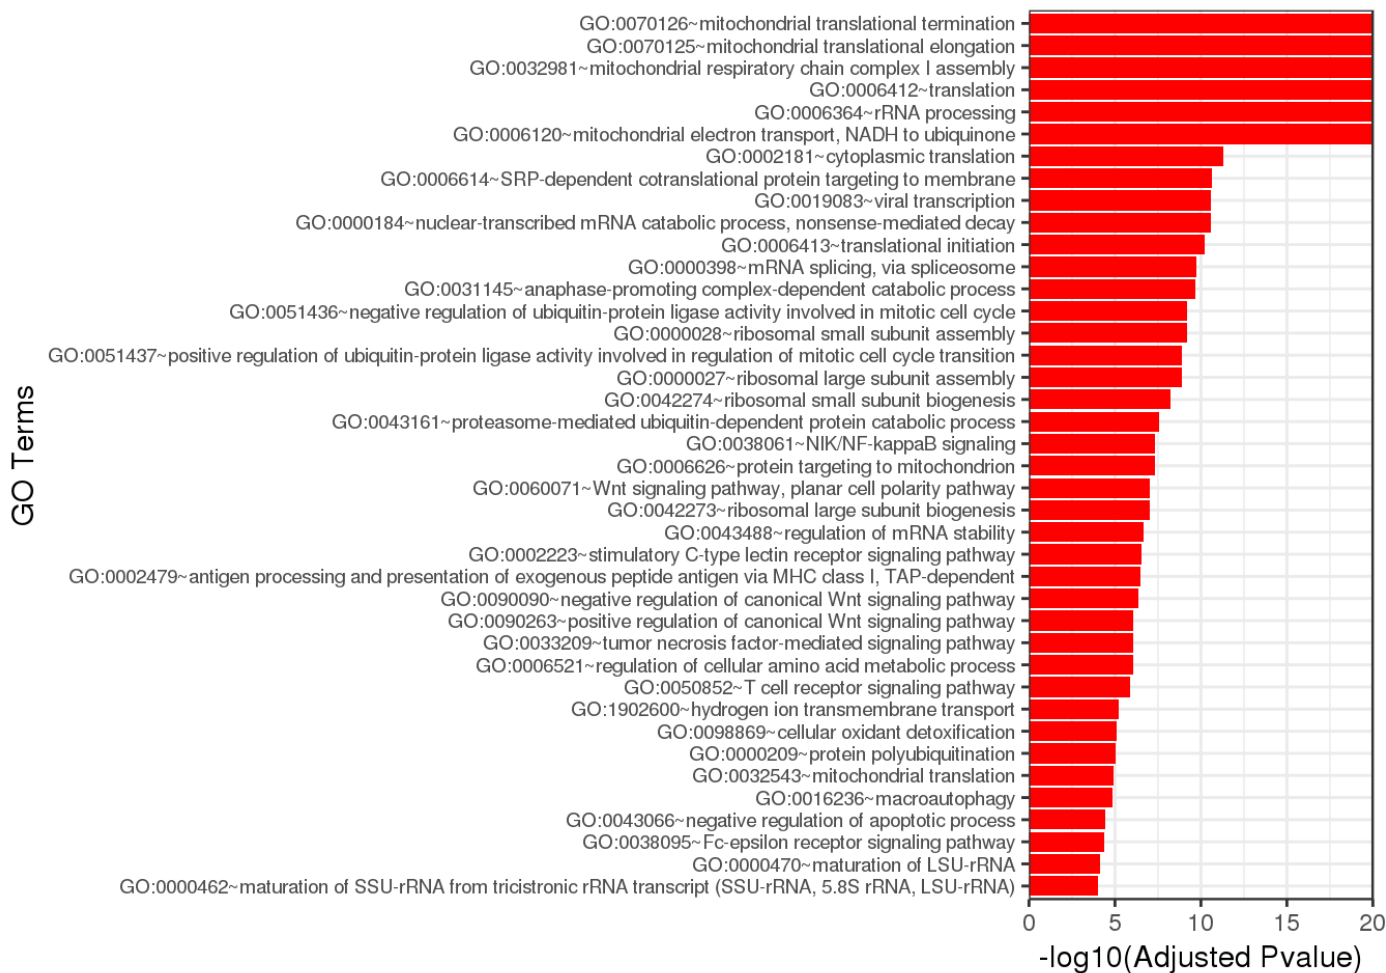

**Figure S5. Gene ontology analysis on the significantly differentially expressed genes the differentiated macrophages with Kasugamycin (KSM) treatment.** The genes were clustered by their gene ontology, and the enrichment of gene ontology terms was tested using Fisher exact test (GeneSCF v1.1-p2). This figure shows gene ontology terms, if any, that are significantly enriched with an adjusted p-value less than 0.05 in the differentially expressed gene sets (up to 40 terms).

A

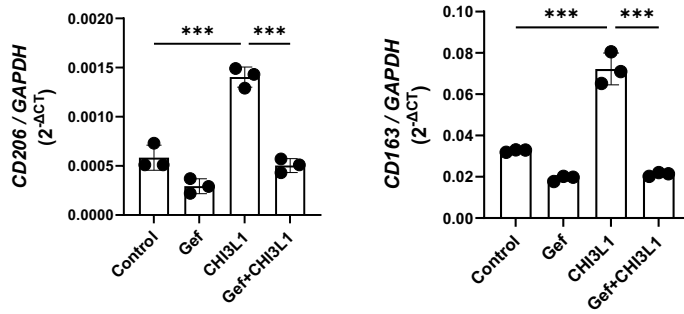

B

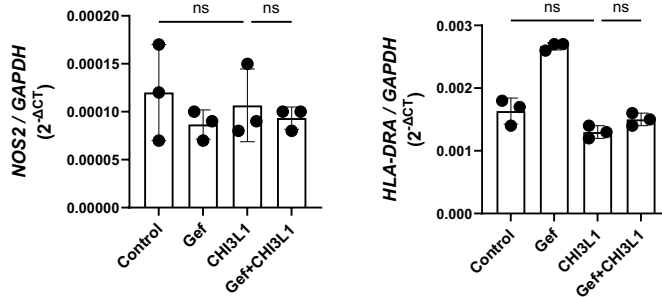

C

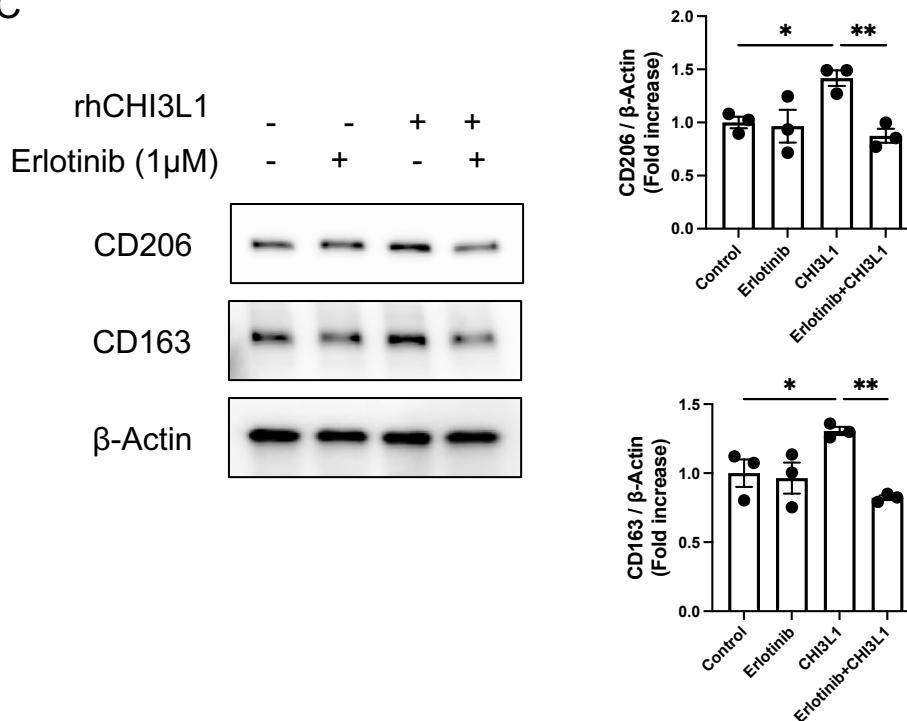

**Figure S6. EGFR inhibition of CHI3L1-driven M2 macrophage differentiation in Human monocytic THP-1 cells.** THP-1 cells were stimulated with CHI3L1 with or without EGFR inhibitor (Gefitinib 1μM 48 hours). The mRNA expressions of CD206 and CD163 (A) and NOS2 and HLA-DRA (B) were evaluated by qRT-PCR. A structurally different EGFR inhibitor (Erlotinib, MilliporeSigma, CDS022564 1μM 72 hours) was used to confirm EGFR dependency. The values are the mean ± SEM. ns, not significant, \**P*<0.05, \*\**P*<0.01, \*\*\**P*<0.001 (One-Way ANOVA, multiple comparisons).

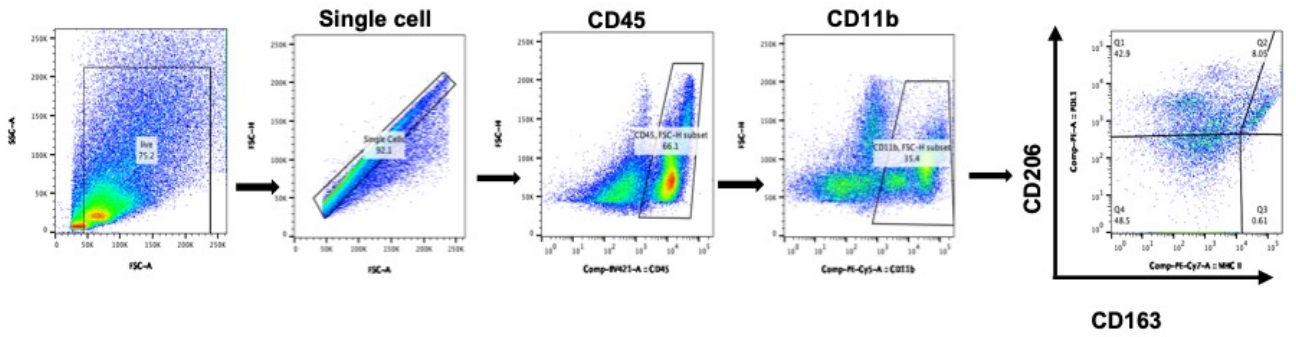

**Figure S7.** Gating strategy of CD206(+)/CD163(+) macrophages in the lungs.

## Supplementary Tables

**Table S1.** List of top 50 differentially expressed genes in the differentiated macrophages with CHI3L1-stimulation: Up-regulated genes (fold change; Log 2).

| Gene Name  | Signal A (PBS) | Signal B (CHI3L1) | Fold Change: Log2 |
|------------|----------------|-------------------|-------------------|
| CXCL13     | 10.4897611     | 5112.79519        | 8.92895648        |
| GJA1       | 1.9668302      | 474.367334        | 7.91395383        |
| ST18       | 1.31122014     | 314.21116         | 7.90464079        |
| EGFR       | 1.31122014     | 271.502847        | 7.69387473        |
| AC011294.1 | 3.27805034     | 594.865788        | 7.50355442        |
| MMP8       | 4.58927048     | 626.897023        | 7.09379629        |
| CCL18      | 0.65561007     | 88.4672198        | 7.0761078         |
| RGS4       | 1.31122014     | 169.307955        | 7.01256           |
| IGFBP3     | 156.690806     | 18762.6771        | 6.90379032        |
| DIRAS2     | 1.31122014     | 144.903205        | 6.78800049        |
| LRFN5      | 3.27805034     | 326.413535        | 6.63769539        |
| FP671120.4 | 3.93366041     | 349.292989        | 6.47239979        |
| MAPK10     | 1.31122014     | 112.87197         | 6.42759924        |
| CCR7       | 8.52293089     | 730.617212        | 6.4216051         |
| RASGEF1B   | 17.7014718     | 1415.47552        | 6.32125955        |
| DPYSL3     | 3.27805034     | 227.269237        | 6.11539904        |
| GLIS3      | 26.8800128     | 1786.12266        | 6.0541418         |
| TFPI2      | 3.27805034     | 208.965674        | 5.99426305        |
| MMP9       | 1025.37415     | 63710.1259        | 5.95729744        |
| NRCAM      | 15.0790316     | 861.792745        | 5.83671276        |
| AC026310.2 | 3.27805034     | 184.560924        | 5.81509483        |
| ITGA1      | 114.076152     | 6304.05206        | 5.78820319        |
| ADAMDEC1   | 664.788609     | 36713.8962        | 5.78728347        |
| LINC01282  | 0.65561007     | 35.0818285        | 5.74168734        |
| TNFRSF9    | 59.6605162     | 3050.59379        | 5.67616164        |
| CLEC4E     | 3.27805034     | 161.681471        | 5.62415268        |
| EBI3       | 113.420542     | 5588.68782        | 5.62274921        |
| LINC01010  | 14.4234215     | 660.453555        | 5.51696042        |
| AC120193.1 | 5.24488054     | 237.946315        | 5.50356649        |
| ITGB8      | 14.4234215     | 651.301773        | 5.49682954        |
| MACC1      | 8.52293089     | 376.748333        | 5.46609451        |

|            |            |            |            |
|------------|------------|------------|------------|
| COL8A1     | 2.62244027 | 114.397267 | 5.44697724 |
| NTRK3      | 13.7678114 | 593.340491 | 5.42947793 |
| MET        | 38.680994  | 1433.77908 | 5.21204664 |
| OLFML2B    | 22.9463524 | 846.539776 | 5.20523238 |
| ST8SIA1    | 5.90049061 | 215.066862 | 5.18779246 |
| TSPAN7     | 5.90049061 | 199.813893 | 5.08166447 |
| CD80       | 7.86732082 | 253.199284 | 5.00824523 |
| TNFRSF18   | 1.31122014 | 41.1830161 | 4.97303447 |
| TNFAIP6    | 18.3570819 | 573.511632 | 4.9654056  |
| XIRP1      | 1.9668302  | 61.0118757 | 4.95512103 |
| NA         | 1.9668302  | 61.0118757 | 4.95512103 |
| SGK1       | 713.303754 | 21714.1266 | 4.92797305 |
| AP003354.2 | 3.93366041 | 117.447861 | 4.89998805 |
| AC112496.1 | 7.86732082 | 218.117456 | 4.79307786 |
| FAM216B    | 7.21171075 | 198.288596 | 4.78110481 |
| RF00443    | 1.9668302  | 53.3853913 | 4.76247612 |
| AL357874.2 | 1.31122014 | 35.0818285 | 4.74170864 |
| TLR8       | 78.0175981 | 1982.88596 | 4.66765429 |
| CCL20      | 46.5483148 | 1160.75094 | 4.64018068 |

**Table S2.** List of top 50 differentially expressed genes in the differentiated macrophages with KSM-stimulation: Up-regulated genes (fold change; Log 2).

| Gene Name  | Signal A (no KSM) | Signal B (KSM) | Fold Change: Log2 |
|------------|-------------------|----------------|-------------------|
| AC090498.1 | 3.03514764        | 131.789306     | 5.4403228         |
| AC116347.1 | 1.51757382        | 52.7157222     | 5.1183947         |
| AC009244.1 | 1.51757382        | 51.3978292     | 5.08186882        |
| PVALB      | 1.51757382        | 48.1030965     | 4.98629116        |
| RPL41P1    | 47.0447885        | 1267.15417     | 4.75141334        |
| RPL21P16   | 3.03514764        | 80.3914764     | 4.72720394        |
| AP000439.3 | 1.51757382        | 38.2188986     | 4.6544476         |
| AL451165.2 | 1.51757382        | 37.5599521     | 4.62935662        |
| GNG11      | 1.51757382        | 34.924166      | 4.52438706        |
| AL355987.3 | 1.51757382        | 34.924166      | 4.52438706        |
| TMEM191C   | 3.03514764        | 68.5304389     | 4.49690632        |
| AC010343.1 | 1.51757382        | 30.9704868     | 4.35105546        |
| BCYRN1     | 1.51757382        | 30.3115403     | 4.32002856        |
| ROMO1      | 34.9041979        | 629.95288      | 4.17377146        |
| NME1-NME2  | 1.51757382        | 27.0168076     | 4.15401861        |
| MDP1       | 3.03514764        | 49.4209896     | 4.0252853         |
| TCAF1P1    | 1.51757382        | 24.3810215     | 4.00591997        |
| AC124067.2 | 1.51757382        | 23.722075      | 3.96639161        |
| AC138761.1 | 3.03514764        | 44.8083639     | 3.88392945        |
| RPL35      | 962.141803        | 13991.4116     | 3.86214818        |
| C10orf143  | 1.51757382        | 21.0862889     | 3.79646661        |
| TMEM183B   | 3.03514764        | 40.8546847     | 3.75066292        |
| GCC2-AS1   | 1.51757382        | 20.4273424     | 3.75066292        |
| AC005540.1 | 1.51757382        | 20.4273424     | 3.75066292        |
| FRG1-DT    | 1.51757382        | 20.4273424     | 3.75066292        |
| PLSCR3     | 1.51757382        | 19.7683958     | 3.7033572         |
| AL512625.2 | 1.51757382        | 19.7683958     | 3.7033572         |
| CDC20P1    | 1.51757382        | 19.7683958     | 3.7033572         |
| TRIM74     | 3.03514764        | 38.8778451     | 3.67910966        |
| AL451085.2 | 3.03514764        | 38.8778451     | 3.67910966        |
| CCDC34     | 3.03514764        | 38.2188986     | 3.6544476         |
| ITPKA      | 1.51757382        | 19.1094493     | 3.6544476         |
| HIST1H2AI  | 1.51757382        | 19.1094493     | 3.6544476         |
| AC064799.1 | 1.51757382        | 19.1094493     | 3.6544476         |

|            |            |            |            |
|------------|------------|------------|------------|
| AL137779.2 | 3.03514764 | 37.5599521 | 3.62935662 |
| RPL41      | 593.371364 | 7286.6307  | 3.61824466 |
| TMED1      | 34.9041979 | 426.99735  | 3.61275465 |
| AC241585.3 | 6.07029529 | 73.8020111 | 3.60382153 |
| PIPSL      | 1.51757382 | 18.4505028 | 3.60382153 |
| AL137782.1 | 4.55272146 | 54.6925618 | 3.58654354 |
| RPS3AP26   | 10.6230167 | 126.517733 | 3.57407418 |
| AC131206.1 | 6.07029529 | 71.166225  | 3.55135411 |
| CD79A      | 1.51757382 | 17.7915562 | 3.55135411 |
| H3F3AP6    | 1.51757382 | 17.7915562 | 3.55135411 |
| FALEC      | 1.51757382 | 17.7915562 | 3.55135411 |
| RPL7P23    | 1.51757382 | 17.7915562 | 3.55135411 |
| AC087289.5 | 1.51757382 | 17.7915562 | 3.55135411 |
| MTHFS      | 22.7636073 | 265.555451 | 3.54421204 |
| CSKMT      | 4.55272146 | 52.7157222 | 3.5334322  |
| YBX1P1     | 80.4314125 | 910.005155 | 3.50004376 |

**Table S3.** List of the genes that were significantly upregulated by CHI3L1 but downregulated by KSM treatment.

| <b>Gene Name</b> | <b>CHI3L1 (fold change: Log2)</b> | <b>KSM (fold change: Log2)</b> |
|------------------|-----------------------------------|--------------------------------|
| EGFR             | 7.69387473                        | -1.0139309                     |
| FP671120.4       | 6.47239979                        | -6.0427372                     |
| AC120193.1       | 5.50356649                        | -1.0459921                     |
| ITGB8            | 5.49682954                        | -1.2342665                     |
| MACC1            | 5.46609451                        | -1.0697516                     |
| AP003354.2       | 4.89998805                        | -1.2608666                     |
| AC112496.1       | 4.79307786                        | -1.134586                      |
| FAM216B          | 4.78110481                        | -2.3679202                     |
| RF00443          | 4.76247612                        | -4.0108883                     |
| AL357874.2       | 4.74170864                        | -1.5571703                     |
| HAUS1P1          | 4.43317949                        | -2.0966182                     |
| CFLAR-AS1        | 4.01403259                        | -2.468878                      |
| AC011944.1       | 3.77804715                        | -1.0140556                     |
| AL357055.3       | 3.60283837                        | -2.2986906                     |
| GUCY1A2          | 3.44815096                        | -1.2885389                     |
| ABCA13           | 3.14582767                        | -1.0474142                     |
| AC121761.1       | 3.02552794                        | -2.0848889                     |
| TDRD6            | 2.9067204                         | -1.2793648                     |
| HSPD1P11         | 2.8906014                         | -1.8759587                     |
| GREM1            | 2.80313303                        | -1.0722889                     |
| RHBDL2           | 2.4339082                         | -2.4192621                     |
| AL138895.1       | 2.42462738                        | -1.6509924                     |
| AC010422.3       | 2.34016853                        | -1.2837037                     |
| PDLIM1P4         | 2.29910081                        | -1.5419496                     |
| RN7SL2           | 2.22054775                        | -1.2980602                     |
| AC106865.1       | 2.17237465                        | -1.3503748                     |
| AL359752.1       | 2.07616223                        | -1.1707435                     |
| FGD5             | 2.04825421                        | -1.6799714                     |
| GXYLT2           | 2.02073516                        | -1.0060873                     |
| MT-TS1           | 1.95514449                        | -2.0400347                     |
| AC018410.1       | 1.8462091                         | -1.8315646                     |
| AC092301.1       | 1.55921758                        | -2.8664984                     |
| AC074032.1       | 1.46972068                        | -2.2624271                     |
| TNC              | 1.39618171                        | -2.4873264                     |
| QRICH2           | 1.3757239                         | -1.1073181                     |
| AC055822.1       | 1.36257213                        | -2.0108883                     |
| PLA2G2F          | 1.34746594                        | -1.2884223                     |
| AC007336.1       | 1.2852975                         | -1.9080775                     |
| H1FX-AS1         | 1.0066801                         | -1.7510212                     |

**Table S4.** List of the genes that were significantly downregulated by CHI3L1 but upregulated by KSM treatment.

| <b>Gene Name</b> | <b>CHI3L1 (fold change: Log2)</b> | <b>KSM (fold change: Log2)</b> |
|------------------|-----------------------------------|--------------------------------|
| AL451085.2       | -2.688671209                      | 3.679109655                    |
| AC067735.1       | -3.781763887                      | 3.255898225                    |
| C2orf72          | -3.17407816                       | 3.118394701                    |
| AL023693.1       | -3.563141835                      | 2.654447601                    |
| CTSG             | -6.300174259                      | 2.554163642                    |
| PTGES3L-AARSD1   | -3.2873255                        | 2.328961687                    |
| GOLGA8J          | -2.911063998                      | 2.255898225                    |
| CCL23            | -2.269069892                      | 2.217930374                    |
| NKD2             | -4.778028722                      | 2.211504105                    |
| AC003070.1       | -3.425638156                      | 2.118394701                    |
| AC099568.2       | -4.941652559                      | 2.044394119                    |
| CD27             | -2.208058332                      | 1.966391607                    |
| TCHH             | -3.305363523                      | 1.897552731                    |
| GALR3            | -2.437148045                      | 1.796466606                    |
| NECAB2           | -3.339794116                      | 1.626541604                    |
| AL359853.1       | -2.366751414                      | 1.603821528                    |
| AL136116.3       | -1.366762378                      | 1.56905611                     |
| FOLR2            | -1.688699115                      | 1.56905611                     |
| AL121761.1       | -1.735990364                      | 1.551354108                    |
| HP               | -3.899252939                      | 1.543700536                    |
| NPAS1            | -1.018846375                      | 1.496906324                    |
| LAMP5            | -3.826192565                      | 1.451818435                    |
| PRR25            | -2.208058332                      | 1.440322796                    |
| CASC10           | -4.046498959                      | 1.381429107                    |
| LINC01624        | -3.284289314                      | 1.381429107                    |
| GPR55            | -1.817427266                      | 1.332519506                    |
| PNOC             | -2.440011971                      | 1.320028562                    |
| FAM72A           | -2.468084126                      | 1.249639234                    |
| AL033527.3       | -3.007870648                      | 1.237039197                    |
| ICAM3            | -4.149365071                      | 1.237039197                    |
| ANKRD34B         | -1.817420861                      | 1.229426013                    |
| SERPINB2         | -4.965011457                      | 1.165700416                    |
| KCNH2            | -1.829111271                      | 1.156362551                    |
| NCALD            | -3.169818589                      | 1.154018611                    |
| BSPRY            | -2.895544588                      | 1.154018611                    |
| LGALS12          | -1.3053691                        | 1.154018611                    |
| AC093616.1       | -2.336392023                      | 1.142241443                    |
| AC098934.1       | -2.688693343                      | 1.138858803                    |
| ANXA3            | -1.208072131                      | 1.136316609                    |
| TMEM139          | -1.366760295                      | 1.118394701                    |

|            |              |             |
|------------|--------------|-------------|
| AZU1       | -4.497323235 | 1.091070114 |
| PLD4       | -2.317727358 | 1.088393563 |
| RIMS4      | -1.43387797  | 1.076574525 |
| HSD11B1    | -5.819331711 | 1.044394119 |
| CCNO       | -2.336382346 | 1.044394119 |
| AC016394.2 | -1.781793989 | 1.044394119 |
| MAGEB2     | -3.455455295 | 1.014371636 |

**Table S5.** List of the primers used in qRT-PCR analysis

| <b>Human Gene</b> | <b>Sequence (5' to 3')</b> |
|-------------------|----------------------------|
| CD206-S           | TCCGGGTGCTGTTCTCCTA        |
| CD206-AS          | CCAGTCTGTTTTTGATGGCACT     |
| CD163-S           | TTTGTCAACTTGAGTCCCTTCAC    |
| CD163-AS          | TCCCGCTACACTTGTTTTAC       |
| CX3CR1-S          | CACAAAGGAGCAGGCATGGAAG     |
| CX3CR1-AS         | CAGGTTCTCTGTAGACACAAGGC    |
| CD274-S           | CAAAGAATTTTGGTTGTGGA       |
| CD274-AS          | AGCTTCTCCTCTCTCTTGGGA      |
| CD36-S            | CAGGTCAACCTATTGGTCAAGCC    |
| CD36-AS           | GCCTTCTCATCACCAATGGTCC     |
| GAPDH-S           | GAAGGTCGGAGTCAACGGATT      |
| GAPDH-AS          | CGCTCCTGGAAGATGGTGAT       |
| HLA-DRA-S         | AGTCCCTGTGCTAGGATTTTTCA    |
| HLA-DRA-AS        | ACATAAACTCGCCTGATTGGTC     |
| NOS2-S            | GCTCTACACCTCCAATGTGACC     |
| NOS2-AS           | CTGCCGAGATTTGAGCCTCATG     |

| <b>Mouse Gene</b> | <b>Sequence (5' to 3')</b> |
|-------------------|----------------------------|
| Cd206-S           | CTCTGTTTCAGCTATTGGACGC     |
| Cd206-AS          | CGGAATTTCTGGGATTCAGCTTC    |
| Cd163-S           | GGTGGACACAGAATGGTTCTTC     |
| Cd163-AS          | CCAGGAGCGTTAGTGACAGC       |
| Nos2-S            | GTTCTCAGCCCAACAATAACAAGA   |
| Nos2-AS           | GTGGACGGGTCGATGTCAC        |
